# Supplementary material for: Metal–organic framework (MOF) facilitated highly stretchable and fatigue-resistant ionogels for recyclable sensors
Source: Royal Society of Chemistry journal article supplement (doi:10.1039/d2mh00880g), 2022-01-01
Supplement: d2mh00880g1.pdf [file d2mh00880g1.pdf]

## Electronic Supplementary Information

Metal-Organic Frameworks (MOFs) Facilitated Highly Stretchable, and  
Fatigue-Resistant Ionogels for Recyclable Sensors

*Qunmeng Xia,<sup>†</sup> Weizheng Li,<sup>†</sup> Xiuyang Zou, Sijie Zheng, Ziyang Liu, Lingling Li and  
Feng Yan\**

Jiangsu Engineering Laboratory of Novel Functional Polymeric Materials, Jiangsu Key  
Laboratory of Advanced Negative Carbon Technologies College of Chemistry, Chemical  
Engineering and Materials Science, Soochow University, Suzhou 215123, China.

E-mail: [fyan@suda.edu.cn](mailto:fyan@suda.edu.cn)

<sup>†</sup>Authors with equal contributions.

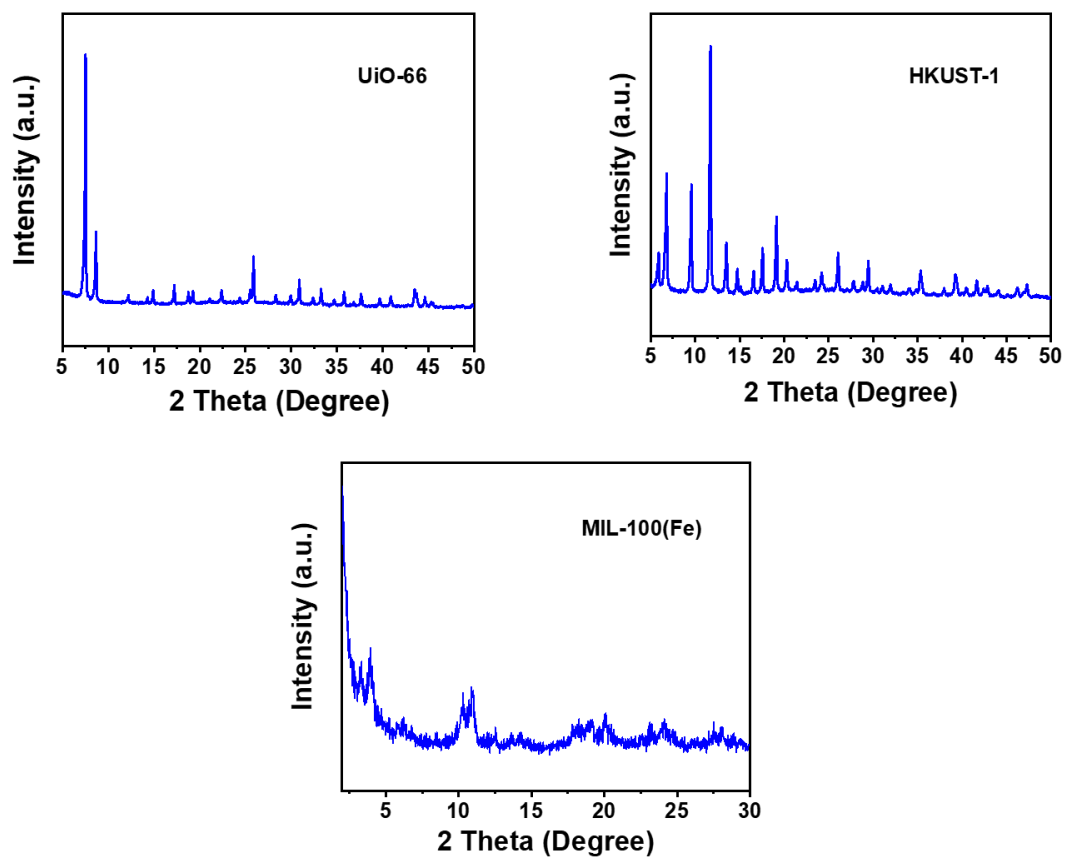

**Figure S1.** Powder X-ray diffraction (PXRD) patterns of three MOFs (UiO-66, HKUST-1, MIL-100(Fe)). Consistent with the XRD in the literature.<sup>[S1-S3]</sup>

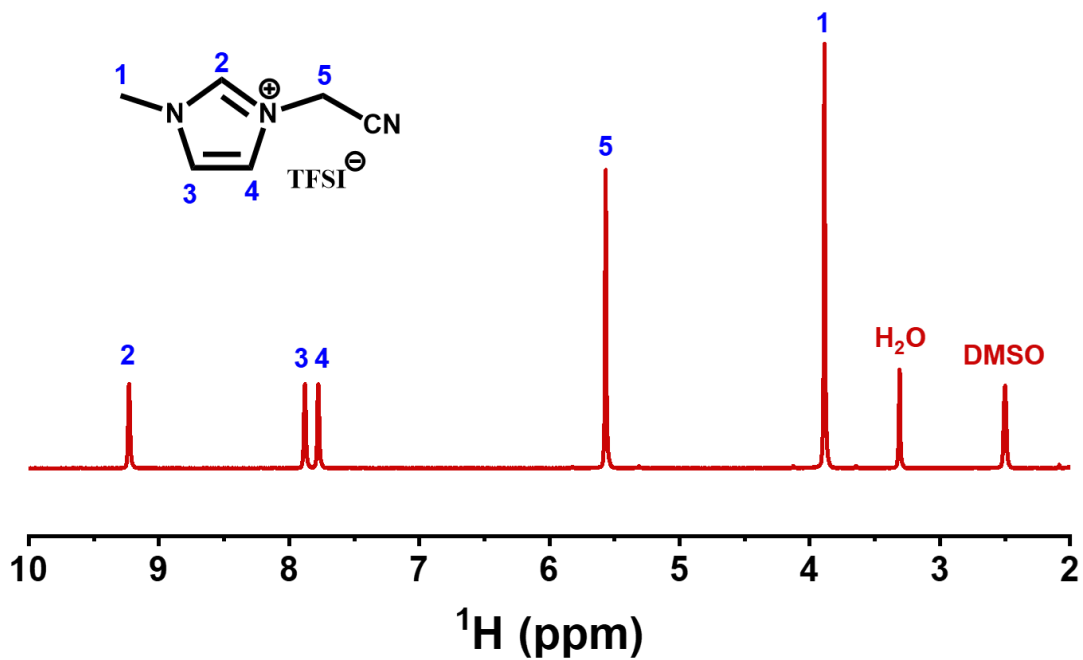

**Figure S2.** <sup>1</sup>H NMR spectroscopy of 1-cyanomethyl-3-methylimidazolium bis[(trifluoromethyl)sulfonyl]imide ([CMMIM]TFSI).

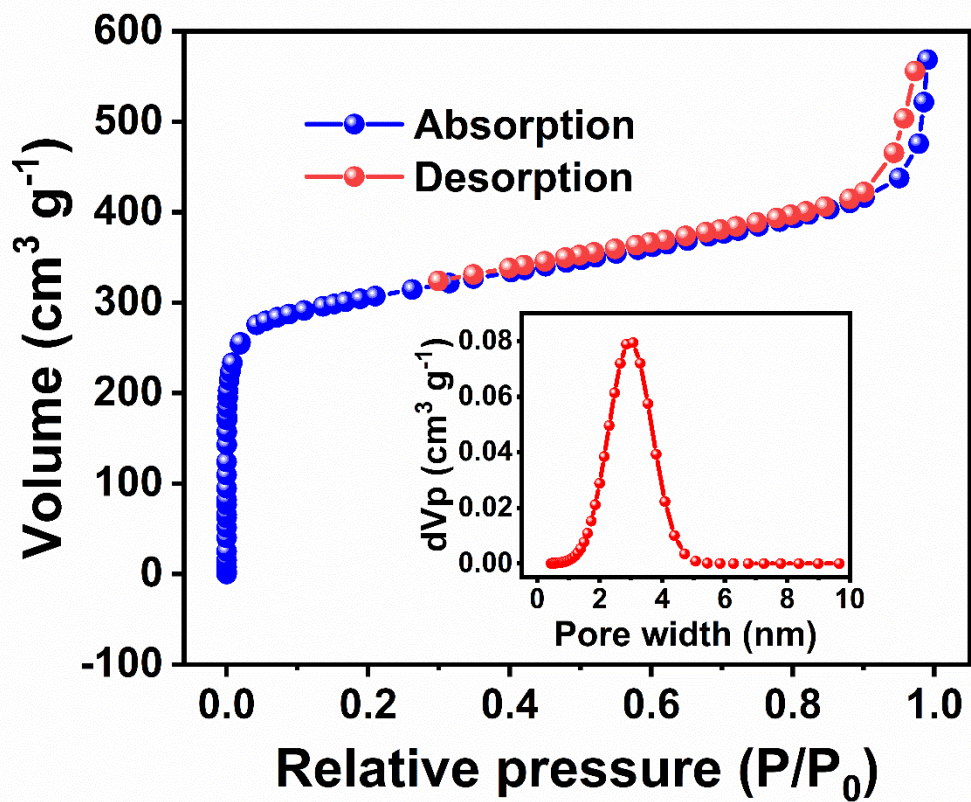

**Figure S3.** Nitrogen adsorption isotherms of UiO-66, and pore-size distributions (inset).

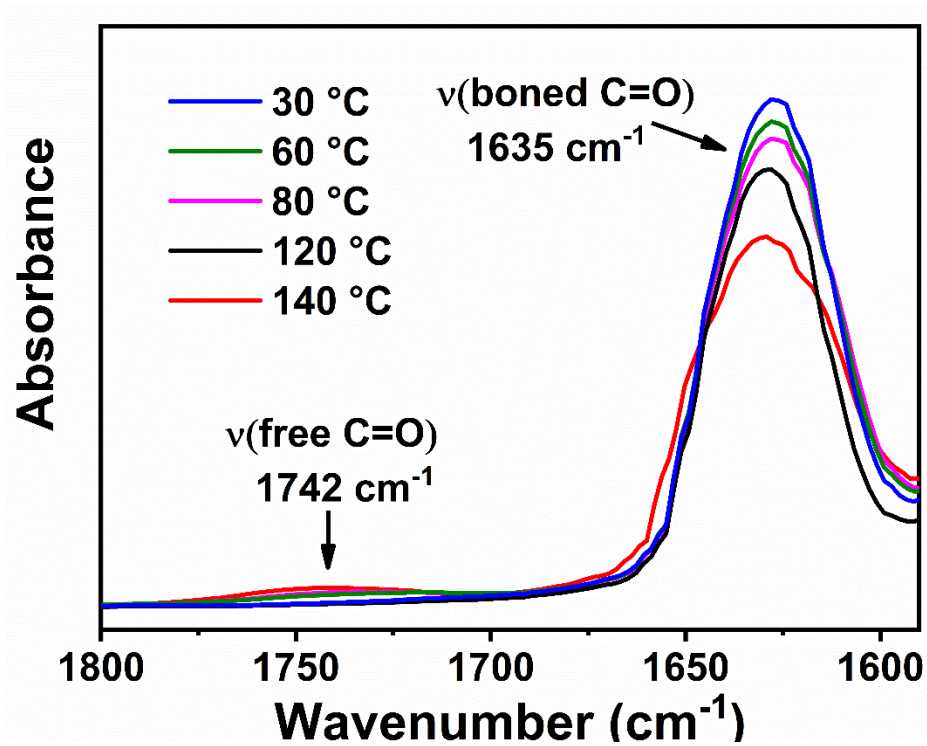

Figure S4. FT-IR spectra of UiO-66-ionogel under different temperature.

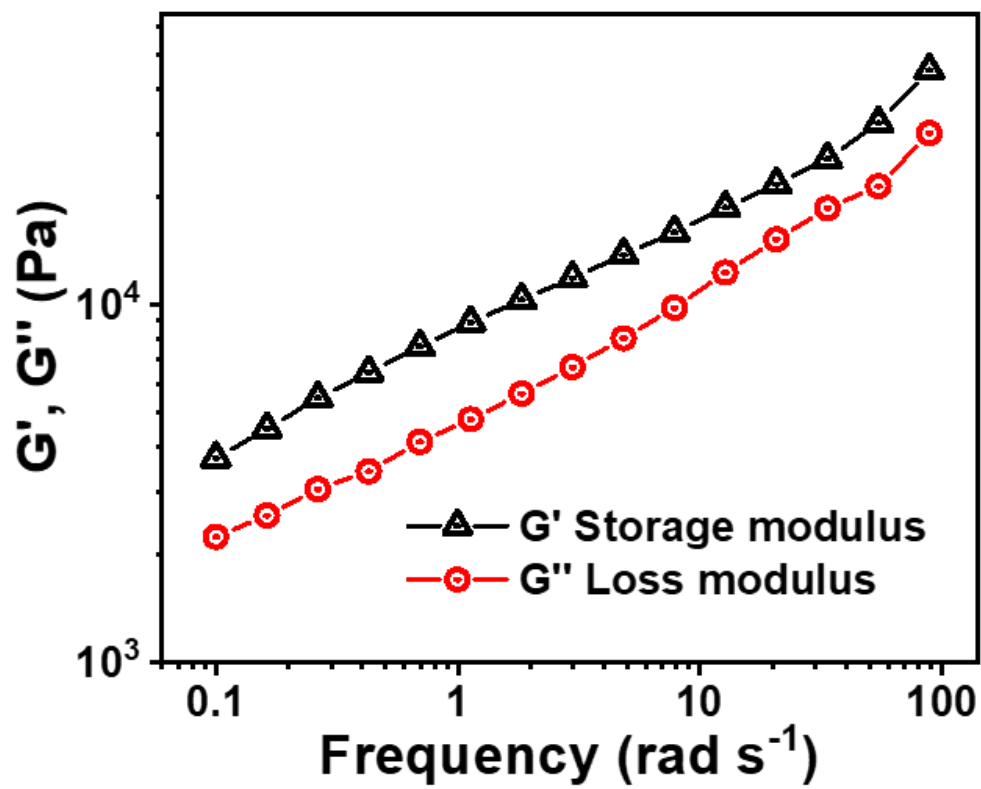

**Figure S5.** Storage modulus  $G'$ , and loss modulus  $G''$  of UiO-66-ionogel (IL: 90 wt%, UiO-66: 0.5 wt%) on frequency sweep at 25 °C.

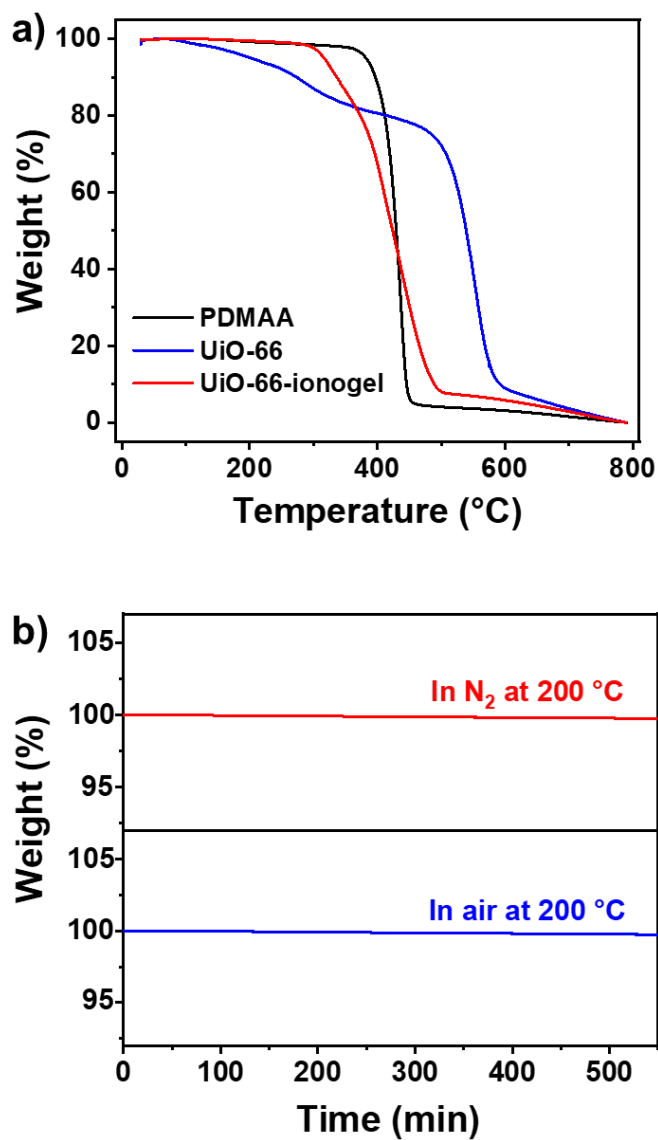

**Figure S6.** (a) Thermal decomposition curves of the PDMAA, UiO-66, and UiO-66-ionogel from 30 °C to 800 °C. PDMAA, UiO-66, and UiO-66-ionogel exhibited  $T_d$  ( $T_d$ : the onset decomposition temperature corresponding to the temperature at which the percent weight loss is approximately 5%) at 364 °C, 93 °C, and 295 °C, respectively. (b) Long-term durability of UiO-66-ionogel in N<sub>2</sub> and air at 200 °C. The test was performed at a heating rate of 10 °C min<sup>-1</sup> under flowing N<sub>2</sub> and air, respectively.

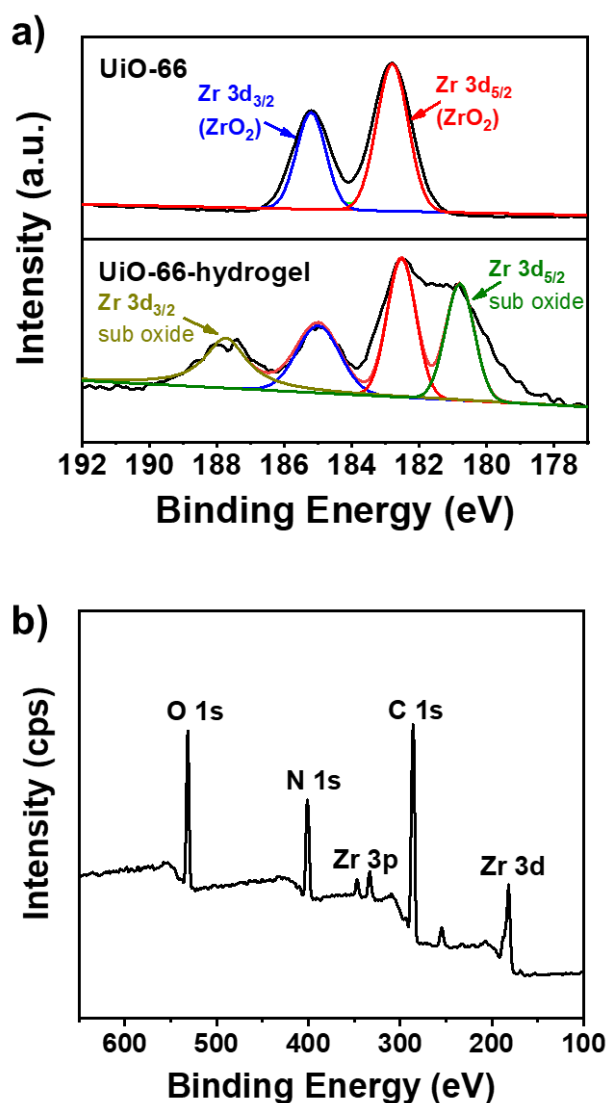

**Figure S7.** (a) Zr 3d results of X-ray photoelectron spectroscopy (XPS) spectrum for UiO-66 and UiO-66-polymer. The Zr of UiO-66 will be separated into two 3d<sub>3/2</sub> (185.2 eV) and 3d<sub>5/2</sub> (182.7 eV) due to the electron spin. However, because the cyano group has a strong coordination effect, it will compete with the ligand on UiO-66 for coordination, so that part of the Zr is coordinated with the cyano group, and the XPS energy spectrum shows two sub oxide peaks 3d<sub>3/2</sub> (187.7 eV) and 3d<sub>5/2</sub> (180.8 eV). The results show that part of the Zr in UiO-66 is coordinated with the cyano group to form a new coordination bond. (b) XPS spectrum of UiO-66-polymer.



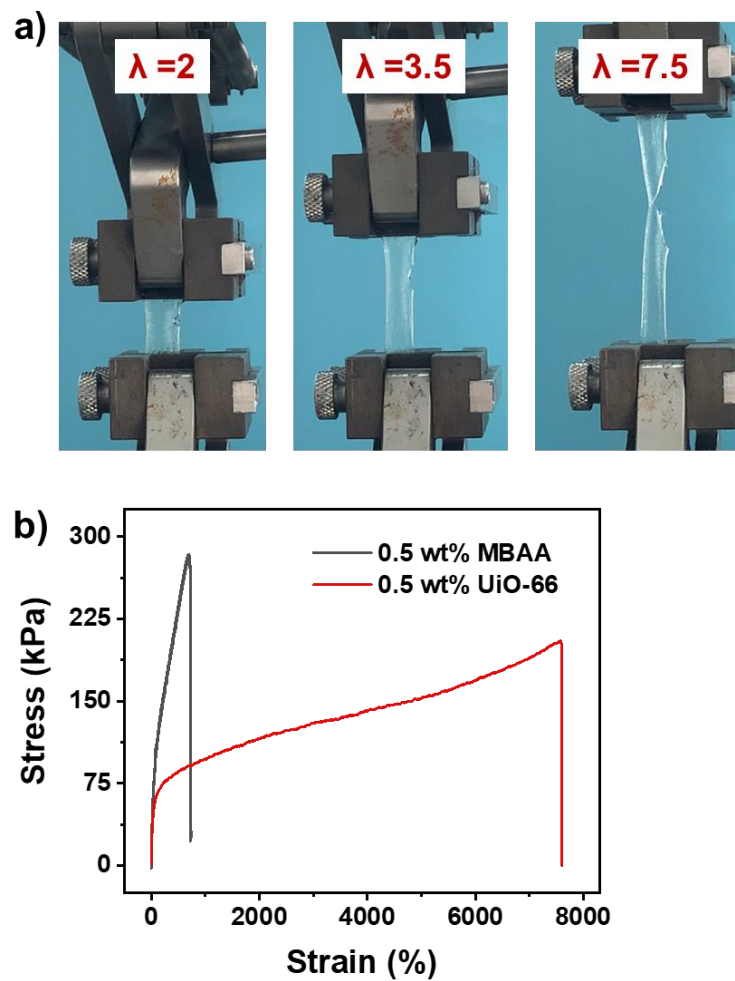

**Figure S8.** (a) Monotonic tensile photographs of notched ionogel containing 0.5 wt% chemical crosslinking agent (MBAA). (b) Comparison of tear resistance between UiO-66 and chemical crosslinker (MBAA) (stretching rate: 50 mm min<sup>-1</sup>).

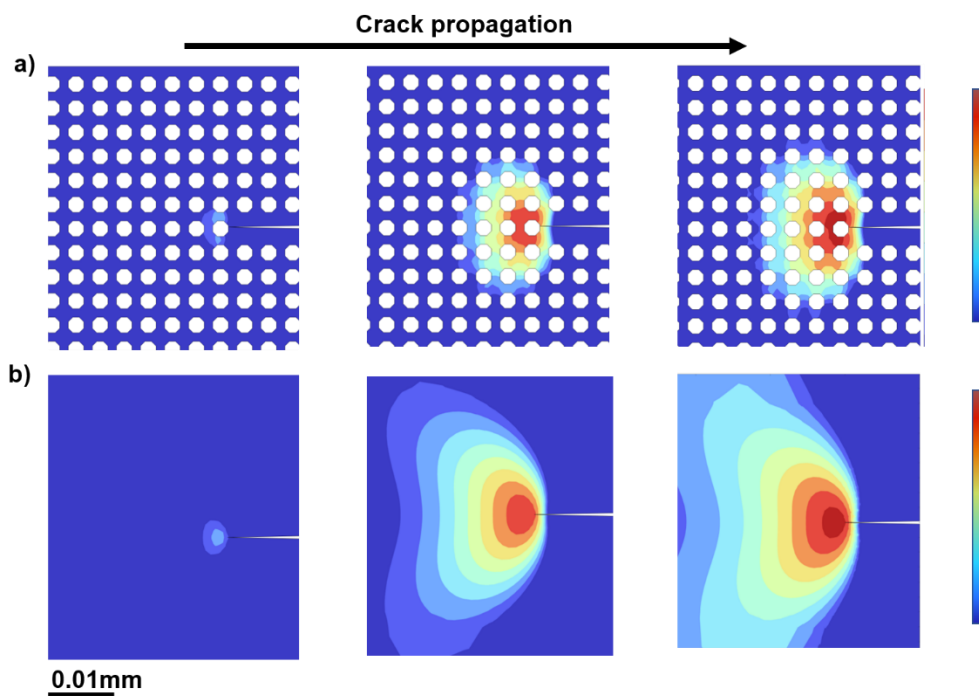

**Figure S9.** Finite element simulations of the crack damage area inside (a)UiO-66-ionogel and (b) ionogel containing chemical crosslinking agent (MBAA).

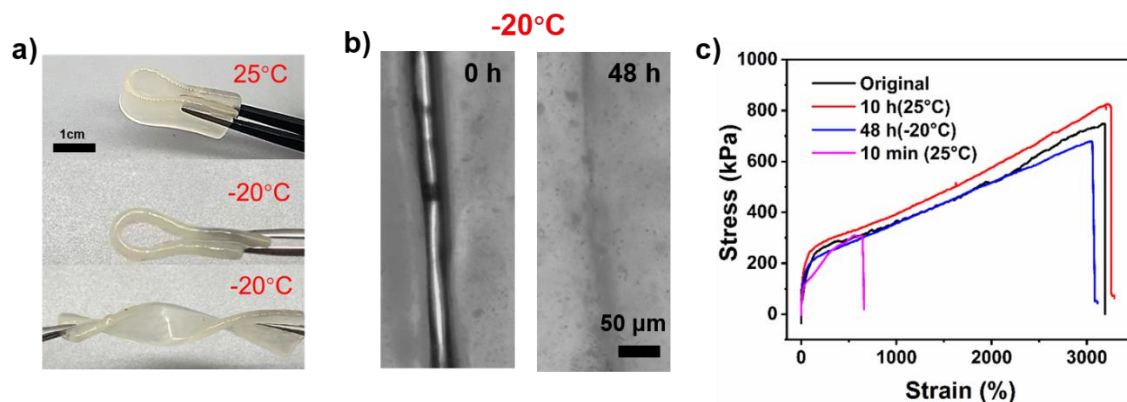

**Figure S10.** (a) Photographs of UiO-66-ionogel being bent and twisted at 25 and  $-20$  °C. (b) Images of completely severed specimens were obtained using an optical microscope at different self-healing time at  $-20$  °C. (c) Monotonic variations in the tensile stress-strain curves of UiO-66-ionogel after self-healing.

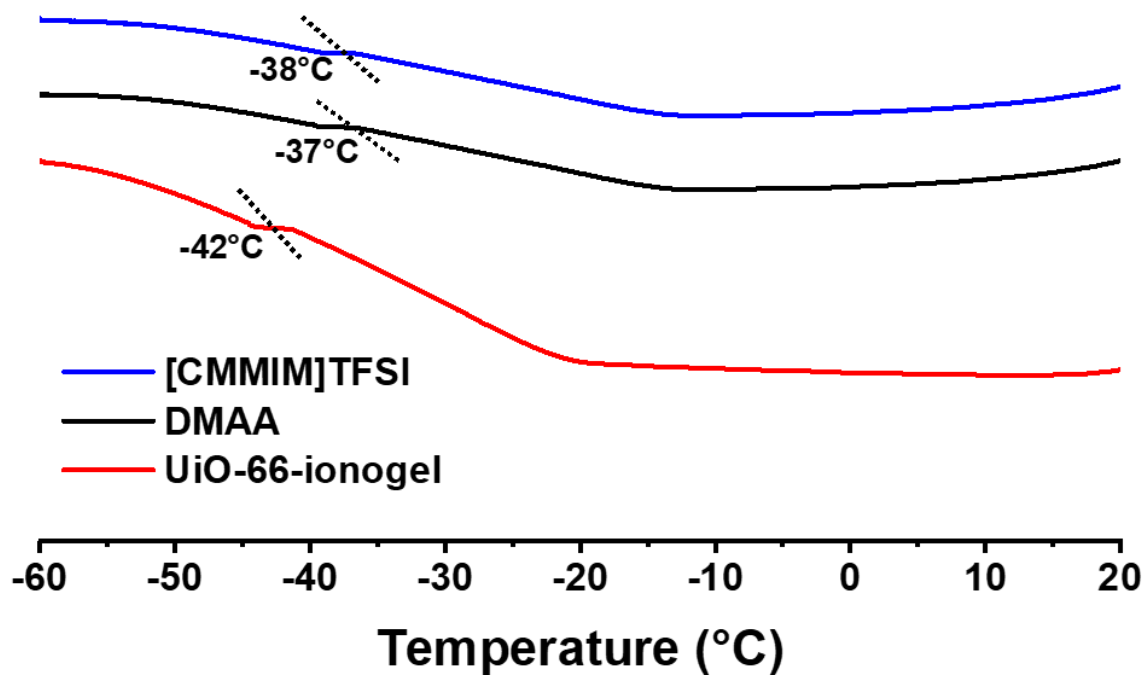

**Figure S11.** Dynamic scanning calorimetry (DSC) curves of ionic liquid [CMMIM]TFSI, DMAA, and UiO-66-ionogel between  $-60$  and  $20$  °C. The test was carried out at a scanning speed of  $5$  °C  $\text{min}^{-1}$  under  $\text{N}_2$  condition.

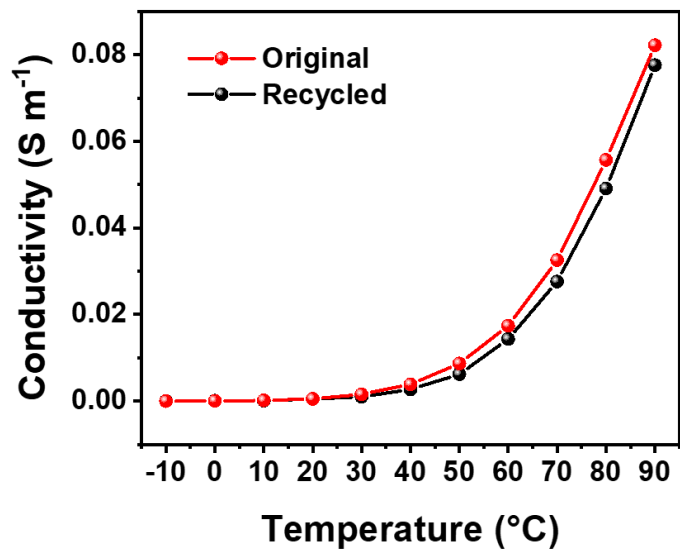

**Figure S12.** Conductivity of original and recycled UiO-66-ionogel (IL: 80 wt%, UiO-66: 0.5 wt%) at different temperatures. The graph showed that the conductivity increased with increasing temperature.

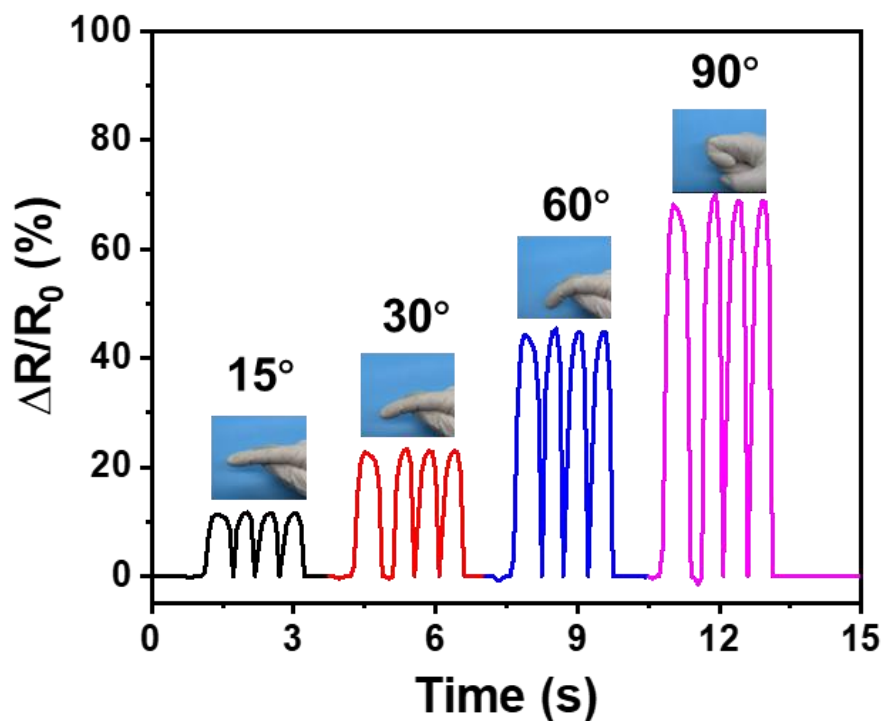

**Figure S13.** Signals of relative electrical resistance during finger bending.

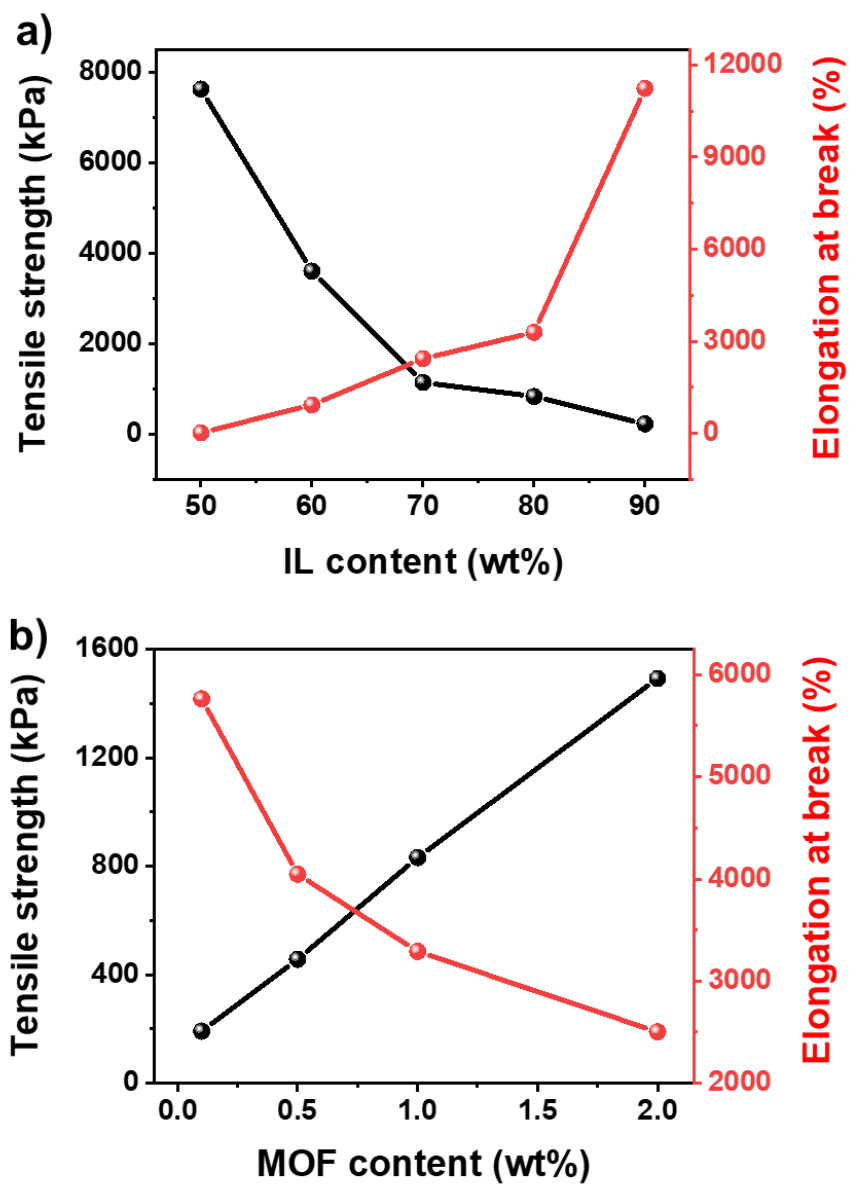

**Figure S14.** (a) Tensile strength and elongation at the break of UiO-66-ionogels with different IL contents at a UiO-66 content of 1.0 wt %. (b) Tensile strength and elongation at the break of UiO-66-ionogels with different MOF contents at IL content of 80 wt %.

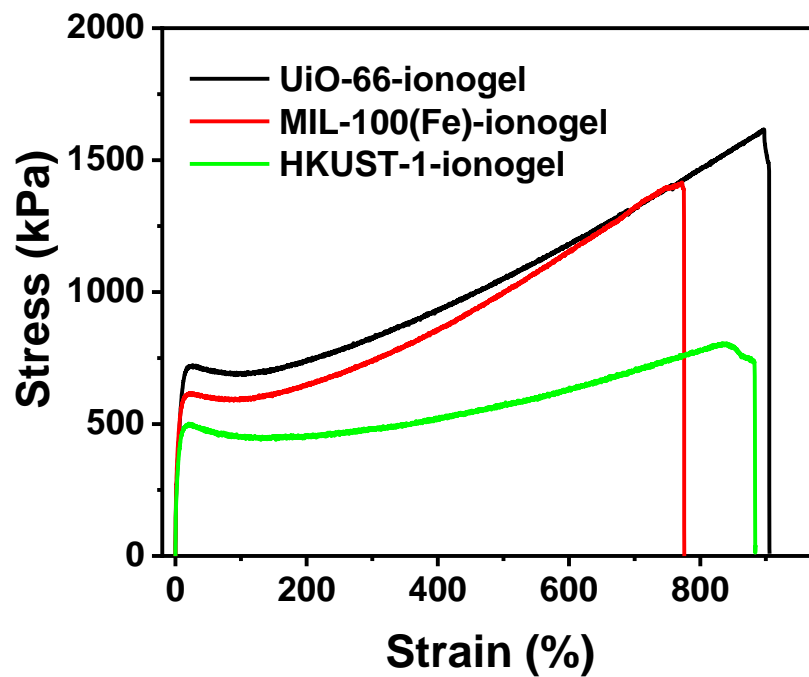

**Figure S15.** Tensile stress-strain curves of three MOFs (UiO-66, MIL-100(Fe), and HKUST-1) as crosslinking agents (IL:80 wt%, MOFs: 1.0 wt%). When UiO-66 was used as a crosslinking agent, the stress increase was the highest. The excellent mechanical properties confirm the applicability of the method.

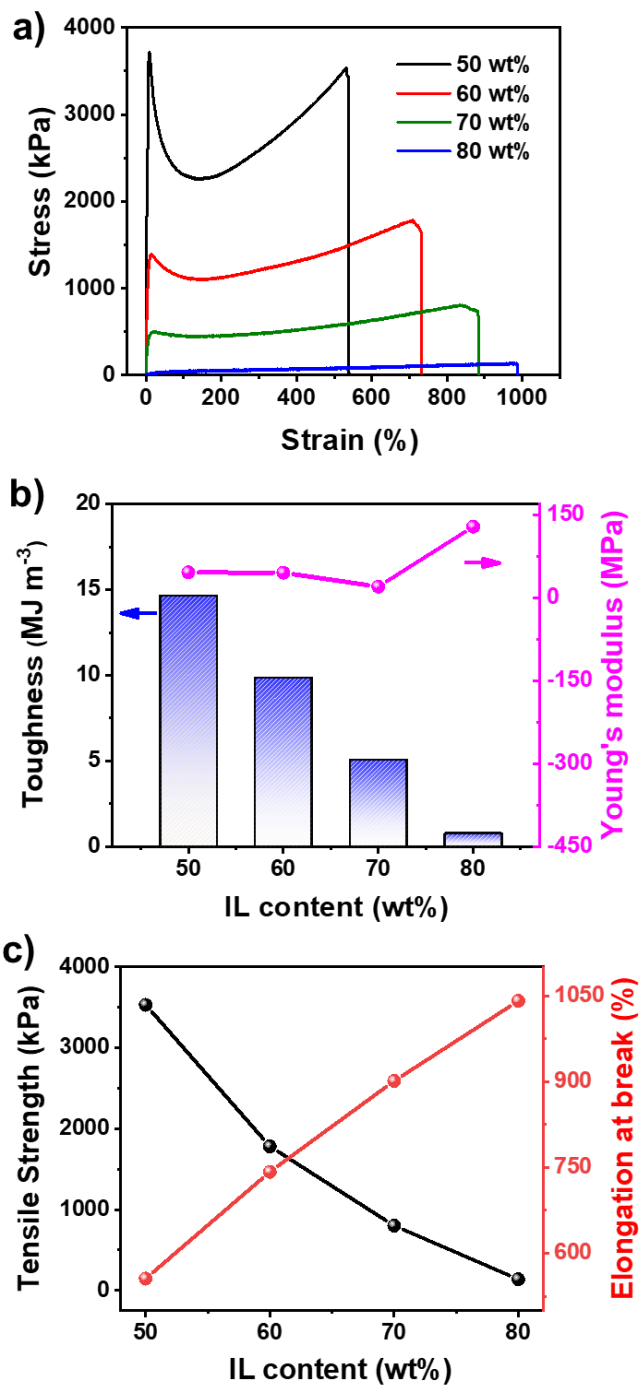

**Figure S16.** (a) Monotonic tensile stress-strain curves, (b) toughness and Young's modulus, and (c) tensile strength and elongation at break of HKUST-1-ionogels at different IL contents with 1.0 wt % HKUST-1.

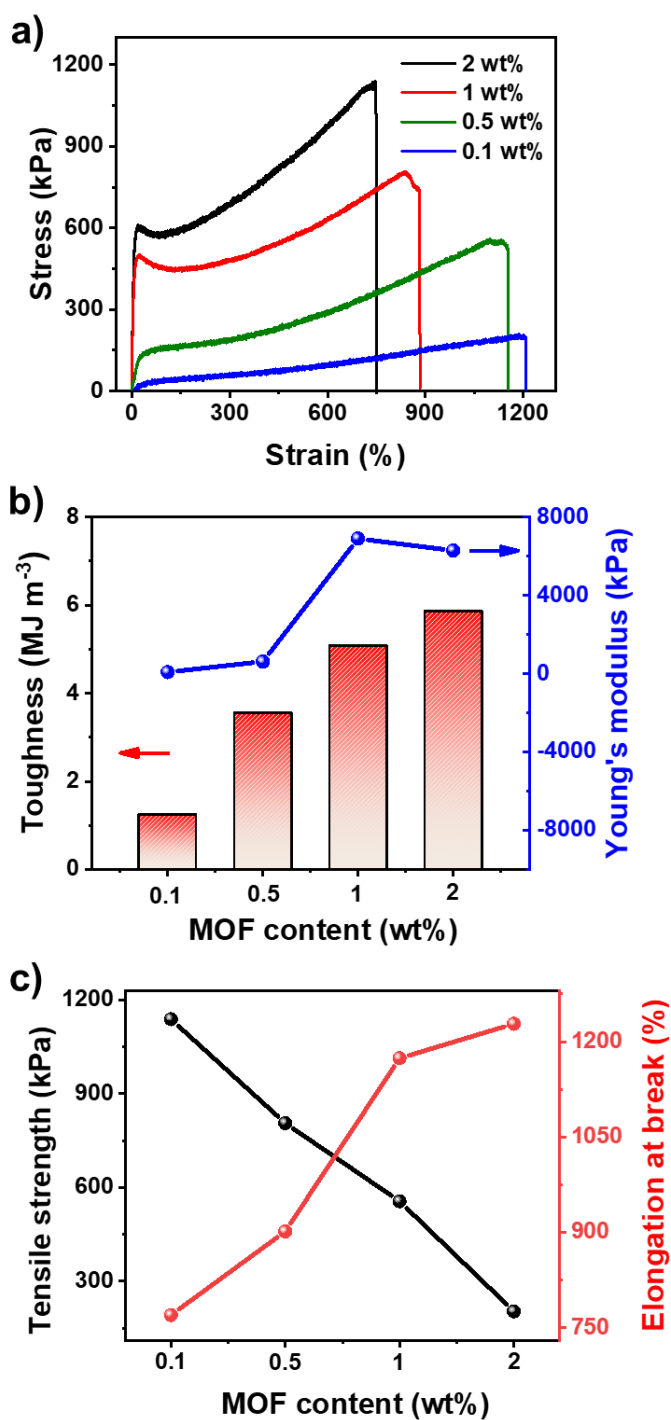

**Figure S17.** (a) Monotonic tensile stress-strain curves, (b) toughness and Young's modulus, and (c) tensile strength and elongation at break of HKUST-1-ionogels at different HKUST-1 contents with 80 wt % IL.



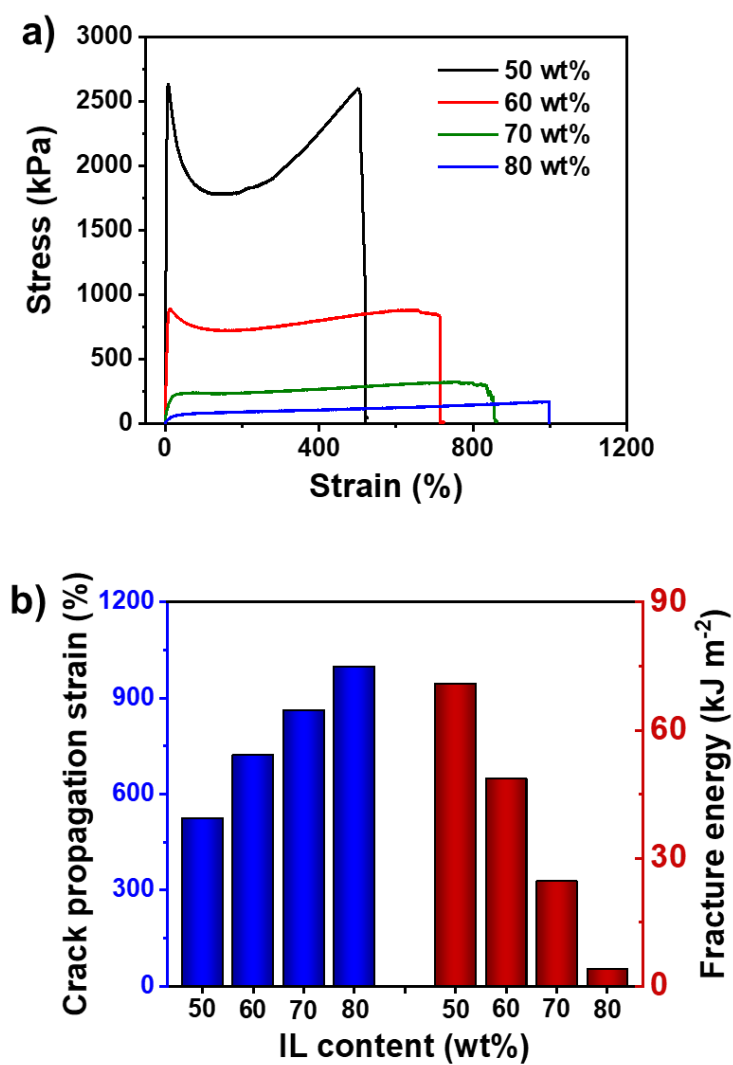

**Figure S18.** (a) Tear resistance of 1.0 wt% HKUST-1-ionogels with different ionic liquid contents. (b) Calculated crack propagation strain and fracture energy. HKUST-1 also prevents crack diffusion effectively.

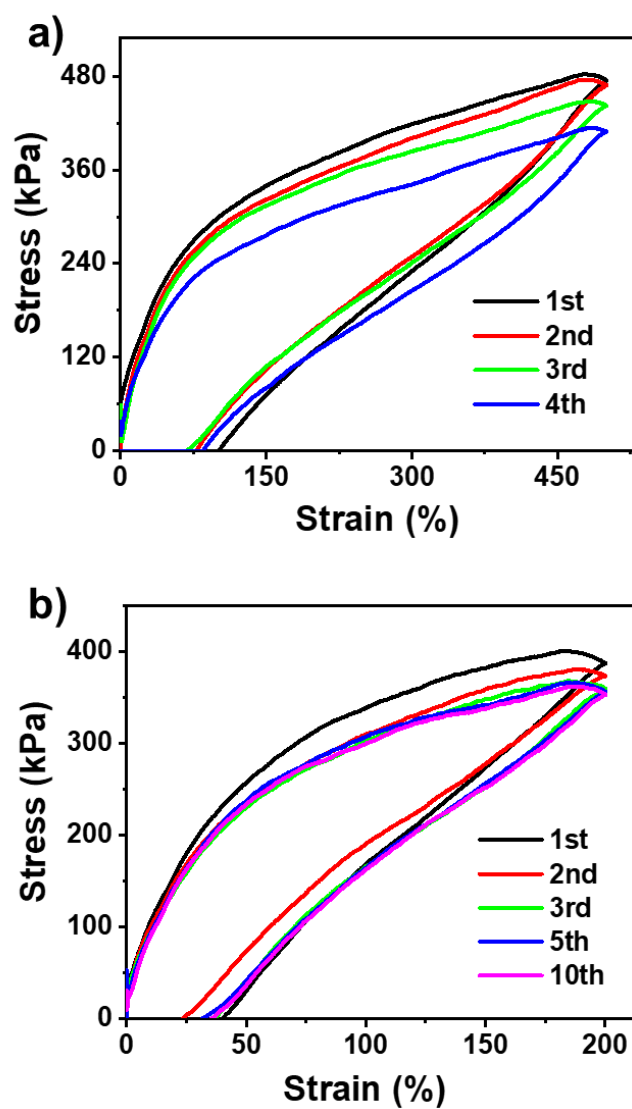

**Figure S19.** Cyclic stress-strain curves of HKUST-1-ionogels at (a) 500% and (b) 200% with 5 min intervals. The HKUST-1-ionogels were pre-stretched before the test.

**Table S1.** Comparison of the mechanical properties of the UiO-66-ionogels presented in this paper and representative gels in recent years.

|                                                         | Stress (MPa) | Strain (%)   | Young's modulus (MPa) | Fatigue threshold (kJ m <sup>-2</sup> ) |
|---------------------------------------------------------|--------------|--------------|-----------------------|-----------------------------------------|
| <b>This work</b>                                        | <b>7.6</b>   | <b>11243</b> | <b>58</b>             | <b>125</b>                              |
| Ref 16: <i>Nat. Mater.</i> 2022, 21, 359                | 12.6         | None         | None                  | None                                    |
| Ref 18: <i>Nano Energy.</i> 2021, 90, 106645            | 5            | 600          | None                  | None                                    |
| Ref 47: <i>Adv. Mater.</i> 2021, 33, e2105306           | 0.72         | 2066         | None                  | None                                    |
| Ref 48: <i>Adv. Funct. Mater.</i> 2021, 31, 2102773     | 0.8          | 2580         | 0.102                 | 2.35                                    |
| Ref 49: <i>Adv. Mater.</i> 2021, 33, 2006111            | 7            | 1640         | 0.9                   | None                                    |
| Ref 50: <i>Adv. Funct. Mater.</i> 2021, 31, 2102386     | 15.6         | 720          | None                  | None                                    |
| Ref 51: <i>J. Mater. Chem. A</i> 2022, 10, 12005        | 7.42         | 1011         | 0.08                  | None                                    |
| Ref 52: <i>Nat. Commun.</i> 2022, 13, 2279              | 1.7          | 30000        | 18                    | 95.265                                  |
| Ref 53: <i>Chem. Mater.</i> 2021, 33, 8418              | 0.15         | 450          | 0.06                  | 0.45                                    |
| Ref 54: <i>Adv. Mater.</i> 2015, 27, 6990               | 6            | 2000         | None                  | None                                    |
| Ref 55: <i>Adv. Mater.</i> 2018, 30, e1706846           | 1.5          | 1200         | 0.98                  | 12                                      |
| Ref 56: <i>Soft Matter.</i> 2014, 10, 7993              | 0.18         | 2800         | 0.7                   | 0.18                                    |
| Ref 57: <i>Mater. Horizons</i> 2020, 7, 912             | 1.7          | 5000         | 0.484                 | 4.7                                     |
| Ref 58: <i>Soft Matter.</i> 2014, 10, 7519              | 1.1          | 2000         | 6.37                  | 30                                      |
| Ref 59: <i>J. Polym. Sci. Pol. Phys.</i> 2015, 53, 1763 | 0.7          | 1300         | None                  | 6.8                                     |
| Ref 60: <i>Adv. Funct. Mater.</i> 2015, 25, 471-480     | 1            | 100          | 5.6                   | 5.5                                     |
| Ref 61: <i>Adv. Mater.</i> 2016, 28, 40                 | 0.002        | 200          | 0.0184                | 0.0396                                  |

## References

- [S1]. X. Peng; L. Ye; Y. Ding; L. Yi; C. Zhang; Z. Wen, Nanohybrid photocatalysts with ZnIn<sub>2</sub>S<sub>4</sub> nanosheets encapsulated UiO-66 octahedral nanoparticles for visible-light-driven hydrogen generation. *Applied Catalysis B: Environmental*, **2020**, *260*, 118152.
- [S2]. C. Yue; L. Wu; Y. Lin; Y. Lu; C. Shang; R. Ma; X. Zhang; X. Wang; W. D. Wu; X. D. Chen; Z. Wu, Study on the Stability, Evolution of Physicochemical Properties, and Postsynthesis of Metal–Organic Frameworks in Bubbled Aqueous Ozone Solution. *ACS Appli. Mater. Interfaces*, **2021**, *13*, 26264.
- [S3]. M. Bagheri; A. Melillo; B. Ferrer; M. Y. Masoomi; H. Garcia, Improved catalytic hydrogen release of quasi HKUST-1 compared to HKUST-1. *Chem. Com.*, **2021**, *57*, 11964.
